# Supplementary material for: Morphology controlling of calcium carbonate by self-assembled surfactant micelles on PET substrate
Source: Royal Society of Chemistry journal article supplement (doi:10.1039/c4ra02694b), 2014-01-01
Supplement: c4ra02694b1.pdf [file c4ra02694b1.pdf]

**Supporting Information for:**  
**Morphology Controlling of Calcium Carbonate by**  
**Self-Assembled Surfactant Micelles on PET Substrate**

Zhenyou Li, Li Xing, Junhui Xiang\*, Xiaohong Liang<sup>1</sup>\*, Chunlin Zhao, Huazheng Sai and

Fei Li

College of Materials Science and Opto-Electronic Technology, University of the

Chinese Academy of Sciences,

Yuquan Road 19A, Beijing, 100049 China

\*To whom correspondence should be addressed. E-mail: [xiangjh@ucas.ac.cn](mailto:xiangjh@ucas.ac.cn)

---

<sup>1</sup> College of Materials Science and Engineering, Taiyuan University of Technology, Taiyuan 030024, China

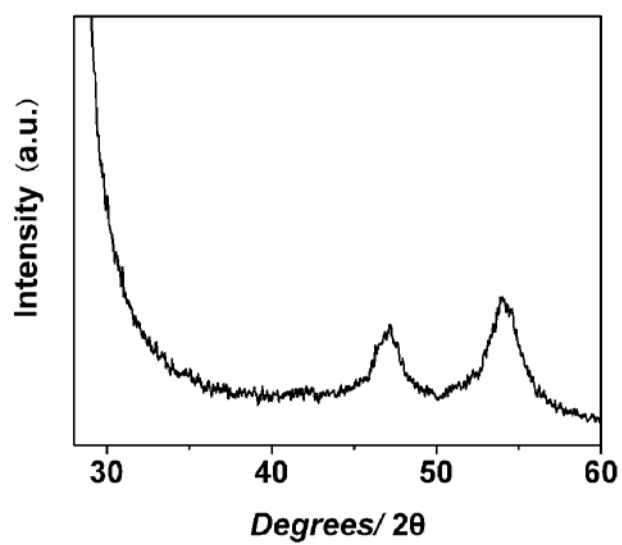

**Figure S1.** The XRD pattern of blank PET substrate. There are two broad peaks observed at  $47.2^{\circ}$  and  $54.1^{\circ}$

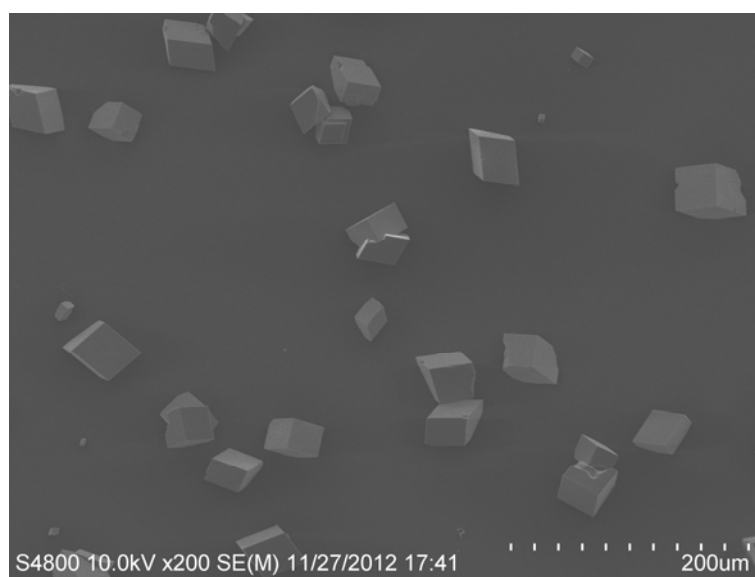

**Figure S2.** The SEM image of crystals grown at the interfaces for 48h.
